# Supplementary material for: The first water-soluble pillar[5]arene dimer: synthesis and construction of a reversible fluorescent supramolecular polymer network in water
Source: Royal Society of Chemistry journal article supplement (doi:10.1039/c6cc08452d), 2016-11-24
Supplement: c6cc08452d1.pdf [file c6cc08452d1.pdf]

## First water soluble pillar[5]arene dimer: synthesis and construction of a reversible fluorescent supramolecular polymer network in water†

Yan Sun,<sup>a,\*</sup> Jin Wang,<sup>c</sup> and Yong Yao<sup>a,b\*</sup>

<sup>a</sup>College of Chemistry and Chemical Engineering, Yangzhou University, Yangzhou, Jiangsu, 225002, P. R. China.

<sup>b</sup>Department of Chemistry, University of Utah, Salt Lake City, 84112, USA.

<sup>c</sup>Research and Development Center, China Tobacco Yunnan Industrial Co.,Ltd., Kunming, 650231, China.

E-mail: yaoyong@zju.edu.cn, ysun@iccas.ac.cn;

### Electronic Supplementary Information (8 pages)

|                                                               |    |
|---------------------------------------------------------------|----|
| 1. <i>Materials and methods</i>                               | S2 |
| 2. <i>Syntheses of water soluble pillar[5]arene dimer</i>     | S3 |
| 3. <i>Characterization of supramolecular polymer networks</i> | S7 |
| 4. <i>References</i>                                          | S8 |

## 1. Materials and methods

All reagents were commercially available and used as supplied without further purification. **P5Br** was prepared according to the literature procedure.<sup>S1</sup>  $^1\text{H}$  or  $^{13}\text{C}$  NMR spectra were recorded with a Bruker Avance DMX 400 spectrophotometer or a Bruker Avance DMX 400 spectrophotometer with use of the deuterated solvent as the lock and the residual solvent or TMS as the internal reference. Viscosity measurements were carried out with a Cannon-Ubbelohde semimicro dilution viscometer at 298K in water. Scanning electron microscopy investigation was carried out on a JEOL 6390LV instrument. The fluorescence spectra were recorded on a Perkin Elmer LS55 fluorescence spectrophotometer. Low-resolution electrospray ionization mass spectra were recorded with a Bruker Esquire 3000 Plus spectrometer. High-resolution mass spectrometry experiments were performed with IonSpec 4.7 Tesla FTMS.

## 2. Syntheses of water soluble pillar[5]arene dimer

**Scheme S1.** Synthetic route for water soluble pillar[5]arene dimer

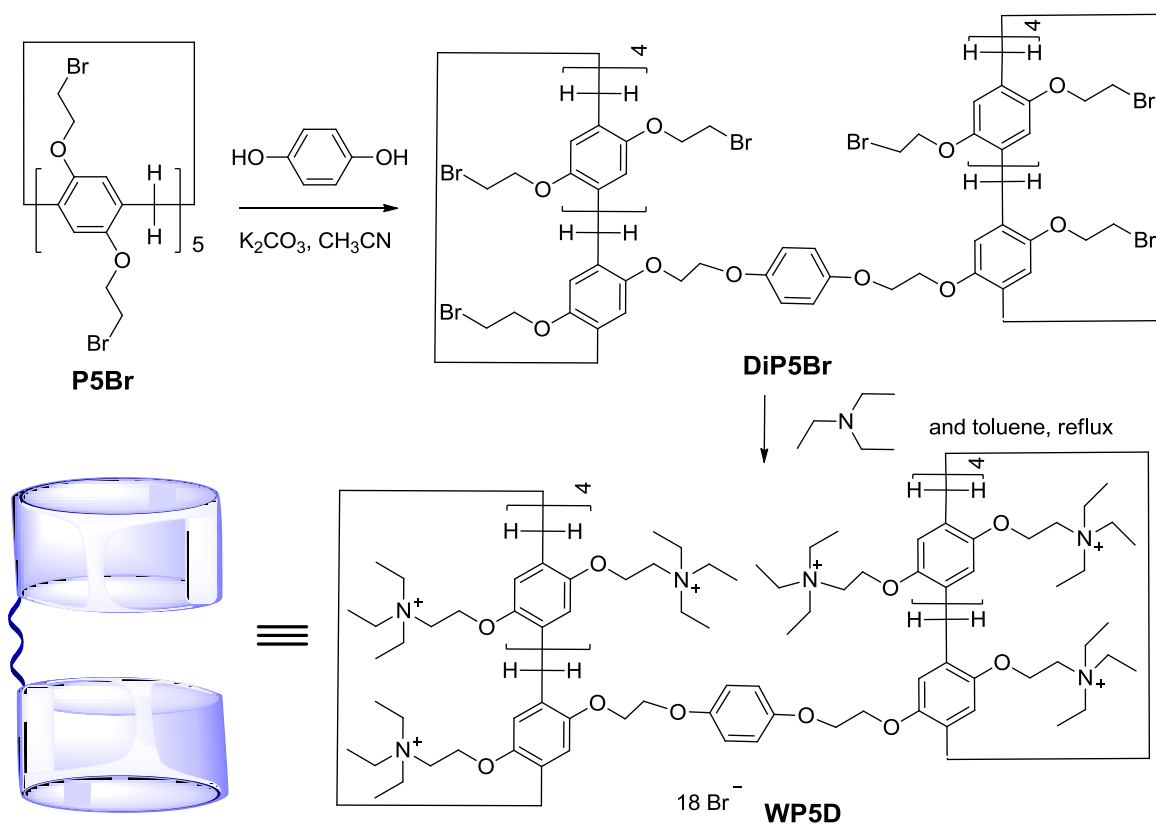

**DiP5Br:** In a 500 mL round-bottom flask, **P5Br** (8.62 g, 5.00 mmol), K<sub>2</sub>CO<sub>3</sub> (1.55 g, 11.25 mmol), hydroquinone (0.11 g, 1.00 mmol) and acetonitrile (350 ml) was added and the reaction mixture was stirred under N<sub>2</sub> for 12 h at 80 °C. After removal of the inorganic salt by filtration, the solvent was evaporated and the residue was dissolved in CH<sub>2</sub>Cl<sub>2</sub>. The resultant solution was washed with H<sub>2</sub>O. The organic phase was collected and dried over anhydrous Na<sub>2</sub>SO<sub>4</sub>. The solvent was evaporated to provide a crude product, which was purified by column chromatography (eluent: petroleum ether/ CH<sub>2</sub>Cl<sub>2</sub>, 10:1) to give **DiP5Br** (2.04 g, 60.0 %) as a white solid. Mp: 98.3–97.5 °C. The proton NMR spectrum of **DiP5Br** is shown in Fig. S1. <sup>1</sup>H NMR (400 MHz, CDCl<sub>3</sub>, 298K) δ (ppm): 7.08 (s, 4H), 6.78–6.67 (m, 16H), 6.57 (s, 2H), 6.48 (s, 2H), 4.42 (s, 4H), 3.86–3.68 (m, 50H), 3.42 (m, 4H), 3.16 (m, 4H), 3.05 (m, 4H), 2.75 (m, 8H), 2.68 (m, 8H), 2.56 (m, 8H).

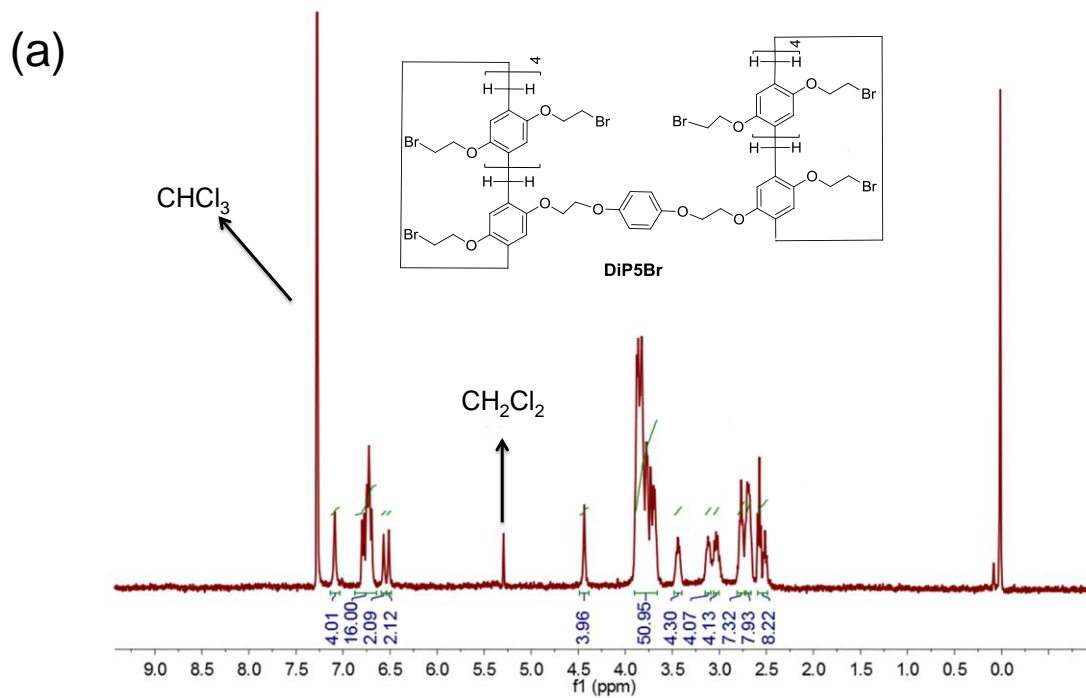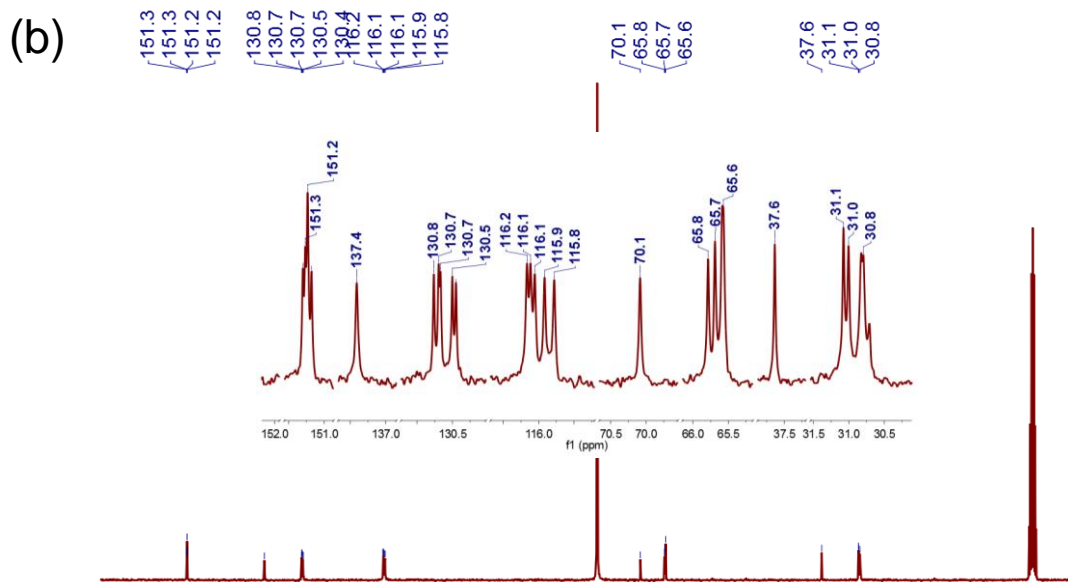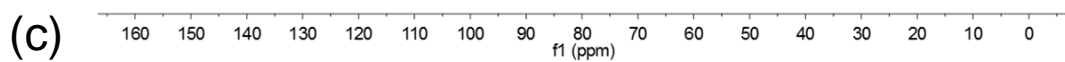

**Figure S1.** (a) <sup>1</sup>H NMR spectrum (400 Hz, CDCl<sub>3</sub>, rt) of **DiP5Br**. (b) <sup>13</sup>C NMR spectrum (100 Hz, CDCl<sub>3</sub>, rt) of **DiP5Br**. (c) Electrospray ionization mass spectrum of **DiP5Br**.

**WP5D**: A mixture of **DiP5Br** (1.70 g, 0.500 mmol) and triethylamine (11.0 g, 100.0 mmol) in toluene (125 mL) was stirred in a 200 mL round-bottom flask at 120 °C for 24 hours. After cooling, the solvent was removed and the residue was recrystallized from ethanol/diethyl ether (1:2) to give a white solid (2.08 g, 81%). The  $^1\text{H}$  NMR spectrum of **WP5D** is shown in Figure S2.  $^1\text{H}$  NMR (400 MHz,  $\text{D}_2\text{O}$ , rt)  $\delta$  (ppm): 6.92-6.69 (m, 24H), 4.12-3.54 (m, 80H), 1.70-1.14 (m, 162H). The  $^{13}\text{C}$  NMR spectrum of **WP5D** is shown in Figure S3.  $^{13}\text{C}$  NMR (100 MHz,  $\text{D}_2\text{O}$ , rt)  $\delta$  (ppm): 149.91, 149.61, 149.44, 149.23, 148.62, 114.91, 114.61, 114.41, 113.73, 113.57, 65.31, 64.27, 64.00, 63.80, 63.54, 49.69, 14.58, 14.49. LRESIMS is shown in Figure S4:  $m/z$  776.2  $[\text{M} - 6\text{Br}]^{6+}$ , 1203.3  $[\text{M} - 4\text{Br}]^{4+}$ . HRESIMS is shown in Figure S5:  $m/z$  of  $[\text{M} - 3\text{Br}]^{3+}$   $\text{C}_{224}\text{H}_{394}\text{N}_{18}\text{O}_{22}\text{Br}_{15}$  1630.94;  $[\text{M} - 4\text{Br}]^{4+}$   $\text{C}_{224}\text{H}_{394}\text{N}_{18}\text{O}_{22}\text{Br}_{14}$  1203.48.

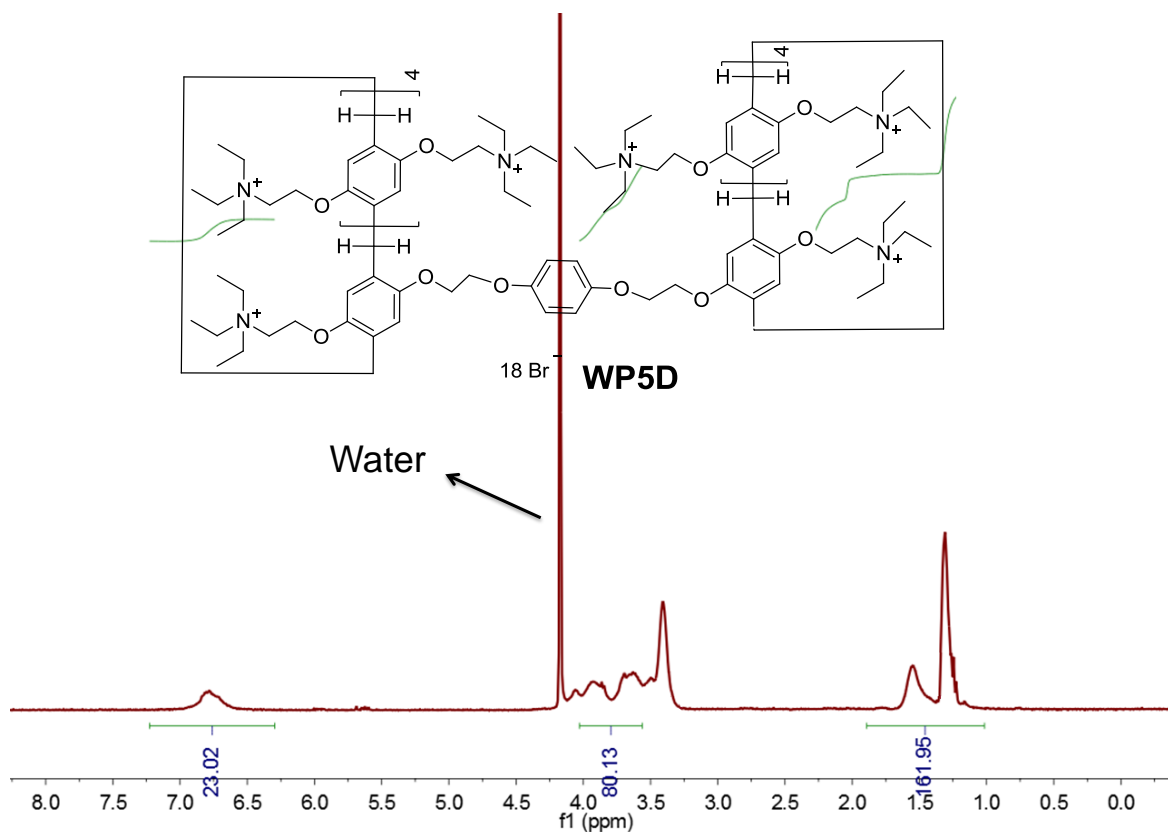

**Figure S2.**  $^1\text{H}$  NMR spectrum (400 MHz,  $\text{D}_2\text{O}$ , rt) of **WP5D**.

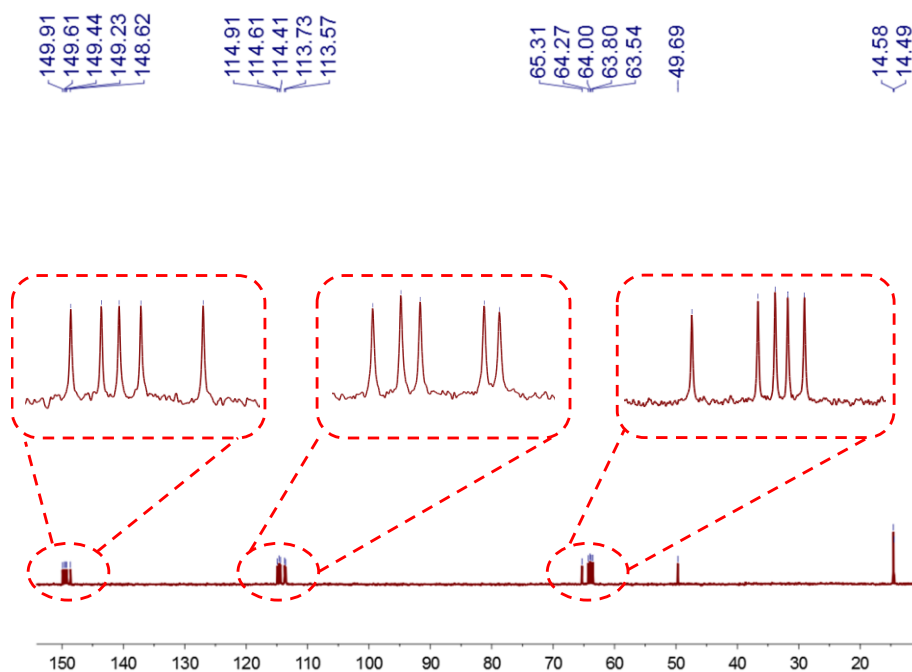

Figure S3.  $^{13}\text{C}$  NMR spectrum (100 MHz,  $\text{D}_2\text{O}$ , rt) of WP5D.

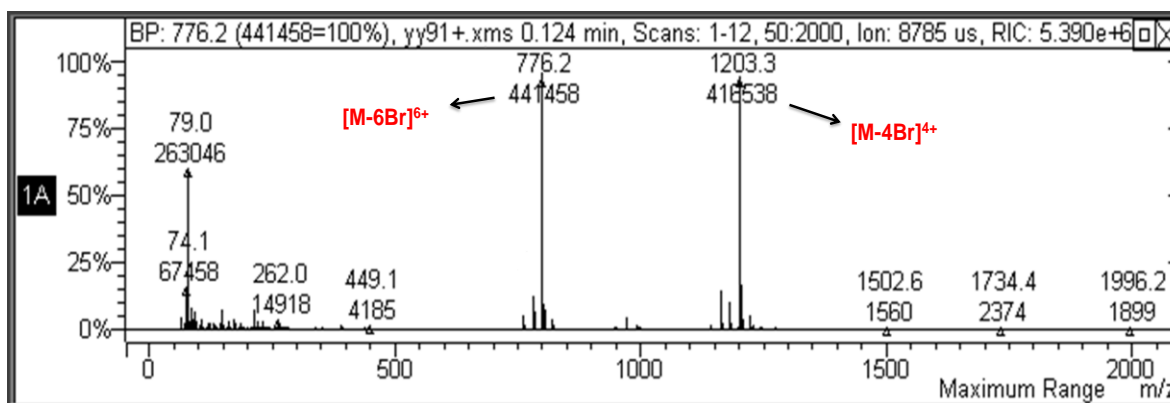

Figure S4. Electrospray ionization mass spectrum of WP5D. Assignment of main peaks:  $m/z$  1203.3  $[\text{M}-4\text{Br}]^{4+}$  and 776.2  $[\text{M}-6\text{Br}]^{6+}$ .

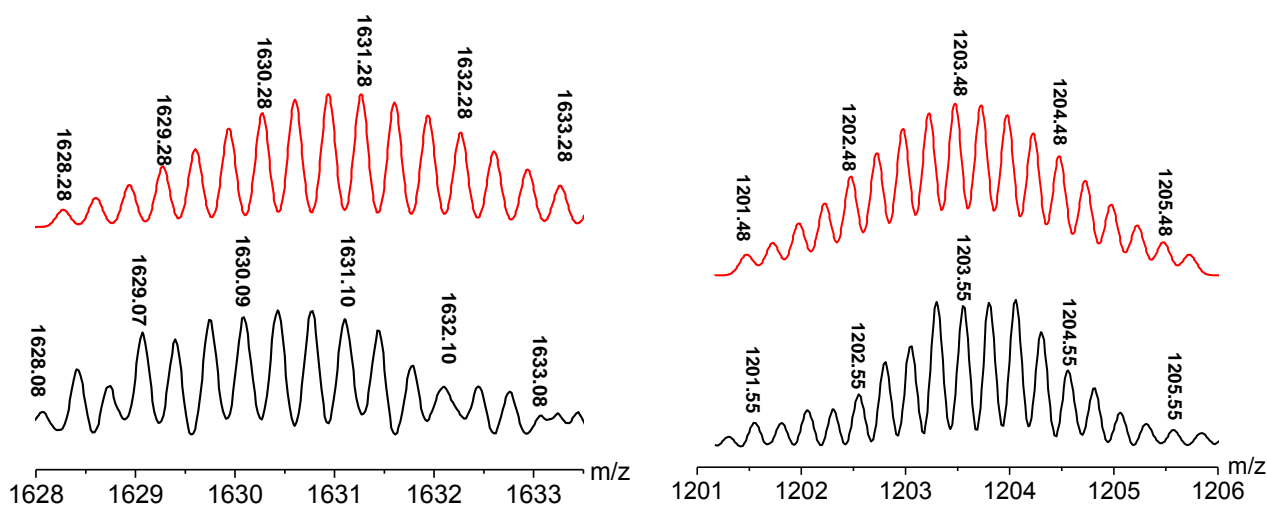

Figure S5. Experimental (black) and calculated (red) ESI-TOF-MS spectra of WP5D  $[\text{M}-3\text{Br}]^{3+}$  and  $[\text{M}-4\text{Br}]^{4+}$ .

### 3. Characterization of supramolecular polymer networks

#### 3.1 Host-guest interaction between model pillar[5]arene and guest

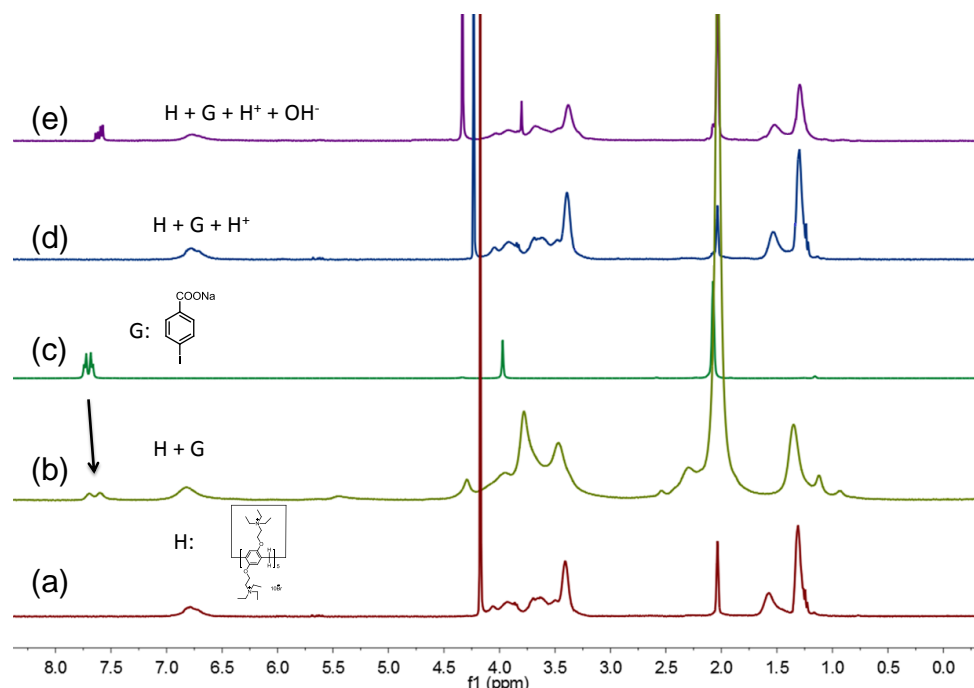

**Figure S6.**  $^1\text{H}$  NMR spectrum (400 MHz,  $\text{D}_2\text{O}/\text{acetone-}d_6$ , rt) of (a) model pillar[5]arene, (b) model pillar[5]arene and guest, (c) model guest, (d) addition of  $\text{H}^+$  to (c), (e) addition of  $\text{OH}^-$  to (d).  $[\text{pillar}[5]\text{arene}] = [\text{guest}] = 2.0 \times 10^{-3} \text{ M}$ .

#### 3.2 Characterization of supramolecular polymer networks

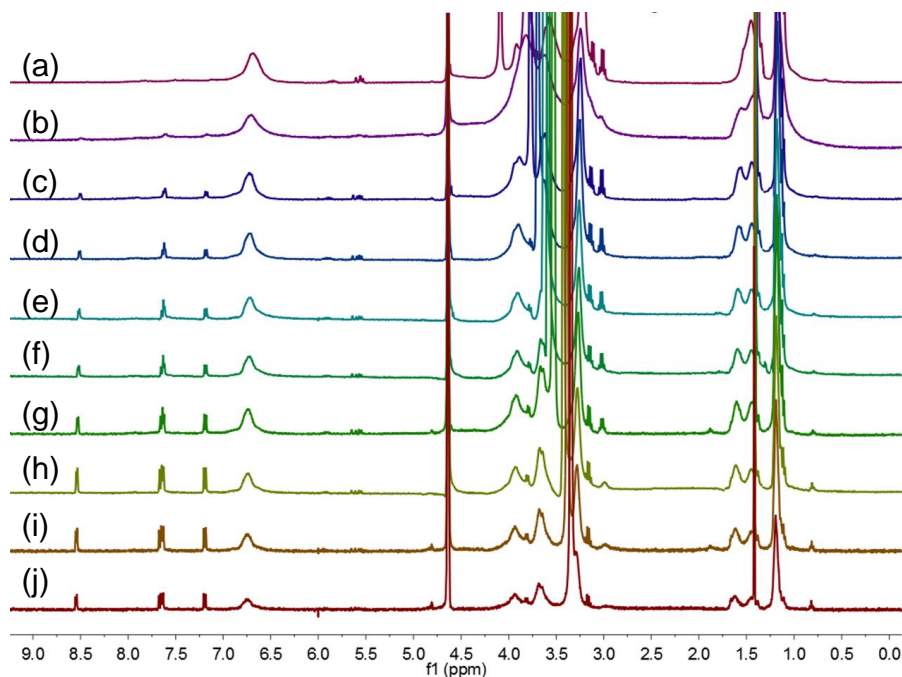

**Figure S7.** Partial  $^1\text{H}$  NMR spectra (400 MHz, 298 K) of **(WP5-dimer) $_2$  carboxylate-TPE** in  $\text{D}_2\text{O}$  at various concentrations: (a) 200 mM; (b) 100 mM; (c) 50.0 mM; (d) 25.0 mM; (e) 15.0 mM; (f) 10.0 mM; (g) 7.00 mM; (h) 5.00 mM; (i) 2.00 mM; (i) 1.00 mM. Here, the concentration is the original **TPE'** concentration.

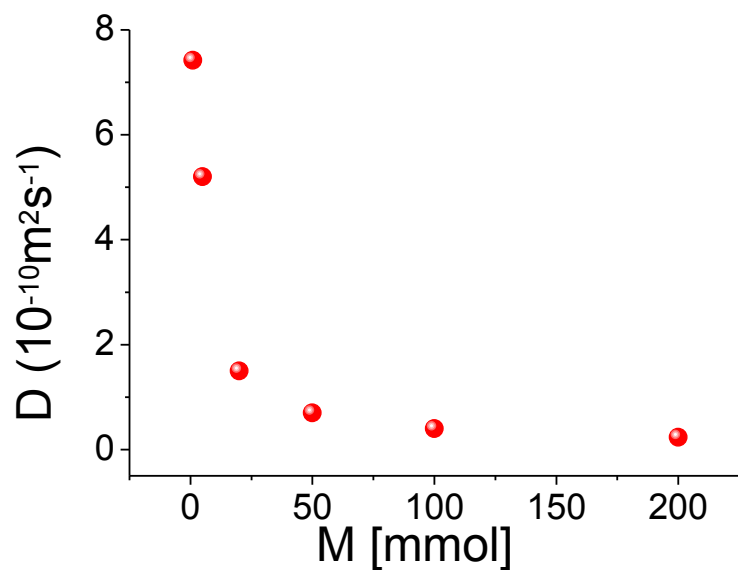

**Figure S8.** Concentration dependence of diffusion coefficient  $D$  (400 MHz,  $\text{D}_2\text{O}$ , 298K).

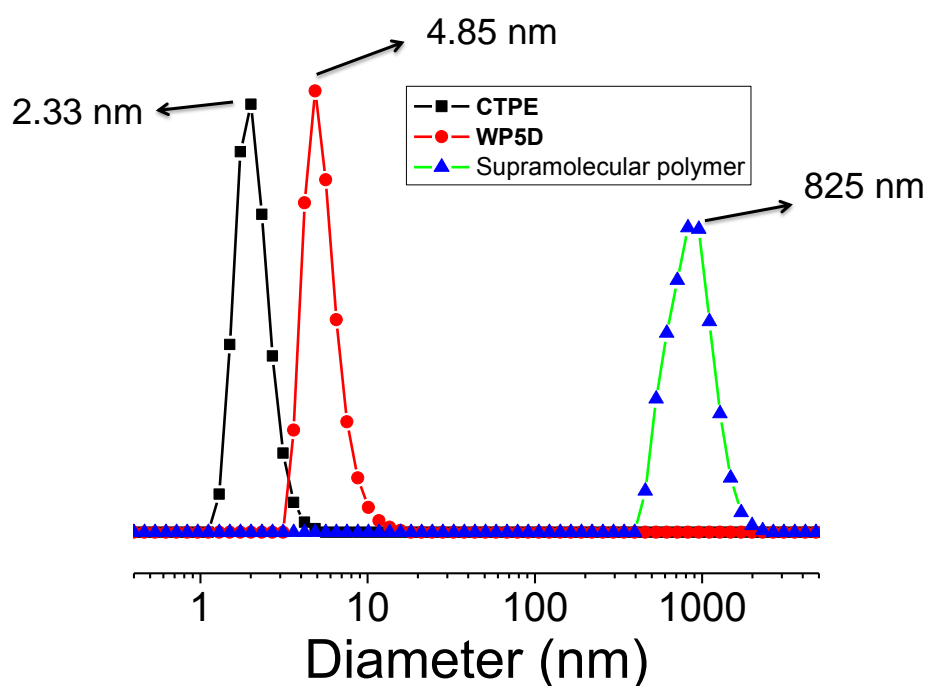

**Figure S9.** DLS experiments of **WP5D** (50 mM, red line), **CTPE** (25 mM, black line) and the supramolecular polymer (green line) in water.

#### 4. References:

- S1. Y. Ma, X. Ji, F. Xiang, X. Chi, C. Han, J. He, Z. Abliz, W. Chen and F. Huang, *Chem. Commun.*, 2011, **47**, 12340–12342.
